# Supplementary material
Source: MDPI journal article supplement (https://www.mdpi.com/2073-4395/12/5/1219)
Supplement: s1 [file s1]

## SUPPLEMENTARY MATERIAL 1-2-3

### 1: Growth model selection and curve parameters

#### Senecio Plant height

##### MODEL SELECTION

```
> AIC(modelLin1, modelExp, modelLog, modelGom)
```

|                          | df       | AIC                          |
|--------------------------|----------|------------------------------|
| Linear modelLin1         | 3        | 693.5859                     |
| Exponential modelExp     | 3        | 973.8861                     |
| Logistic modelLog        | 4        | 660.5268                     |
| <b>Gompertz modelGom</b> | <b>4</b> | <b>659.9546 → best Model</b> |

##### #---Gompertz MICROPLASTIC

```
> modelGomA <- drm(H_max~ Time, fct=G.3(), data = Micro)
```

```
> summary(modelGomA)
```

Model fitted: Gompertz with lower limit at 0 (3 parms)

Parameter estimates:

|               | Estimate    | Std. Error | t-value | p-value       |
|---------------|-------------|------------|---------|---------------|
| b:(Intercept) | -0.0170908  | 0.0019281  | -8.8639 | 6.710e-13 *** |
| d:(Intercept) | 108.0269301 | 39.2973561 | 2.7490  | 0.007676 **   |
| e:(Intercept) | 95.6044683  | 13.5654668 | 7.0476  | 1.245e-09 *** |

---

Signif. codes: 0 '\*\*\*' 0.001 '\*\*' 0.01 '\*' 0.05 '.' 0.1 ' ' 1

Residual standard error: 2.516466 (67 degrees of freedom)

##### #---Gompertz CONTROL

```
> modelGomB <- drm(H_max~ Time, fct=G.3(), data = CONTROL)
```

```
> summary(modelGomB)
```

Model fitted: Gompertz with lower limit at 0 (3 parms)

Parameter estimates:

|               | Estimate    | Std. Error | t-value  | p-value       |
|---------------|-------------|------------|----------|---------------|
| b:(Intercept) | -0.0165826  | 0.0007199  | -23.0346 | < 2.2e-16 *** |
| d:(Intercept) | 262.0247383 | 53.5651303 | 4.8917   | 6.577e-06 *** |
| e:(Intercept) | 110.7644425 | 5.6881400  | 19.4729  | < 2.2e-16 *** |

---

Signif. codes: 0 '\*\*\*' 0.001 '\*\*' 0.01 '\*' 0.05 '.' 0.1 ' ' 1

Residual standard error: 2.054765 (67 degrees of freedom)

## Senecio Plant width

### MODEL SELECTION

> AIC(modelLin1, modelExp, modelAsy, modelLog, modelGom)

|                 | df              | AIC                          |
|-----------------|-----------------|------------------------------|
| Linear          | modelLin1       | 3                            |
| Exponential     | modelExp        | 3                            |
| Logistic        | modelLog        | 4                            |
| <b>Gompertz</b> | <b>modelGom</b> | <b>4</b>                     |
|                 |                 | <b>515.3365 → best Model</b> |

### #---Gompertz MICROPLASTIC

> modelGomA <- drm(W\_max~ Time, fct=G.3(), + data = Micro)

> summary(modelGomA)

Model fitted: Gompertz with lower limit at 0 (3 parms)

Parameter estimates:

|               | Estimate  | Std. Error | t-value | p-value       |
|---------------|-----------|------------|---------|---------------|
| b:(Intercept) | -0.084826 | 0.019723   | -4.3009 | 5.652e-05 *** |
| d:(Intercept) | 9.213638  | 0.801902   | 11.4897 | < 2.2e-16 *** |
| e:(Intercept) | 17.332810 | 1.720009   | 10.0772 | 4.678e-15 *** |

---

Signif. codes: 0 '\*\*\*' 0.001 '\*\*' 0.01 '\*' 0.05 '.' 0.1 ' ' 1

Residual standard error: 1.695173 (67 degrees of freedom)

### #---Gompertz CONTROL

```
> modelGomB <- drm(W_max~ Time, fct=G.3(), data = Control)
```

```
> summary(modelGomB)
```

Model fitted: Gompertz with lower limit at 0 (3 parms)

Parameter estimates:

|               | Estimate   | Std. Error | t-value | p-value       |
|---------------|------------|------------|---------|---------------|
| b:(Intercept) | -0.0602768 | 0.0081225  | -7.421  | 2.659e-10 *** |
| d:(Intercept) | 13.1655764 | 1.0302783  | 12.779  | < 2.2e-16 *** |
| e:(Intercept) | 21.8879049 | 1.7394998  | 12.583  | < 2.2e-16 *** |

---

Signif. codes: 0 '\*\*\*' 0.001 '\*\*' 0.01 '\*' 0.05 '.' 0.1 ' ' 1

Residual standard error: 1.04562 (67 degrees of freedom)

## Centaurea Plant width

### MODEL SELECTION

```
> AIC(modelLin1, modelExp, modelAsy, modelLog, modelGom)
```

|  | df | AIC |
|--|----|-----|
|--|----|-----|

|                  |   |          |
|------------------|---|----------|
| Linear modelLin1 | 3 | 569.7401 |
|------------------|---|----------|

|                      |   |          |
|----------------------|---|----------|
| Exponential modelExp | 3 | 912.4039 |
|----------------------|---|----------|

|                          |          |                              |
|--------------------------|----------|------------------------------|
| <b>Logistic modelLog</b> | <b>4</b> | <b>487.3535 → best Model</b> |
|--------------------------|----------|------------------------------|

|                   |   |          |
|-------------------|---|----------|
| Gompertz modelGom | 4 | 489.0323 |
|-------------------|---|----------|

### > #---Logistic MICROPLASTIC

```
> modelLogA <- drm(W_max~ Time, fct=L.3(), data = Micro)
```

```
> summary(modelLogA)
```

Model fitted: Logistic (ED50 as parameter) with lower limit fixed at 0 (3 parms)

Parameter estimates:

|               | Estimate  | Std. Error | t-value | p-value       |
|---------------|-----------|------------|---------|---------------|
| b:(Intercept) | -0.179287 | 0.024404   | -7.3465 | 6.405e-10 *** |
| d:(Intercept) | 13.650060 | 0.442941   | 30.8169 | < 2.2e-16 *** |
| e:(Intercept) | 15.869073 | 0.923046   | 17.1921 | < 2.2e-16 *** |

---

Signif. codes: 0 '\*\*\*' 0.001 '\*\*' 0.01 '\*' 0.05 '.' 0.1 ' ' 1

Residual standard error: 1.887986 (60 degrees of freedom)

> #---Logistic CONTROL

```
modelLogB <- drm(W_max~ Time, fct=L.3(), data = Control)
> summary(modelLogB)
```

Model fitted: Logistic (ED50 as parameter) with lower limit fixed at 0 (3 parms)

Parameter estimates:

|               | Estimate  | Std. Error | t-value | p-value       |
|---------------|-----------|------------|---------|---------------|
| b:(Intercept) | -0.182461 | 0.017367   | -10.506 | 1.46e-14 ***  |
| d:(Intercept) | 15.693909 | 0.360419   | 43.544  | < 2.2e-16 *** |
| e:(Intercept) | 16.154117 | 0.650009   | 24.852  | < 2.2e-16 *** |

---

Signif. codes: 0 '\*\*\*' 0.001 '\*\*' 0.01 '\*' 0.05 '.' 0.1 ' ' 1

Residual standard error: 1.460335 (53 degrees of freedom)

## Centaurea Plant heighth

```
> AIC(modelLin1, modelExp, modelAsy, modelLog, modelGom)
```

|               | df               | AIC                          |
|---------------|------------------|------------------------------|
| <b>Linear</b> | <b>modellin1</b> | <b>3</b>                     |
|               |                  | <b>539.2306 → best Model</b> |
| Exponential   | modelExp         | 3                            |
|               |                  | 876.8423                     |

|          |          |   |          |
|----------|----------|---|----------|
| Logistic | modelLog | 4 | 556.5415 |
| Gompertz | modelGom | 4 | 548.7721 |

> #---Linear **MICROPLASTIC**

```
modelLin1A <- lm(H_max~ Time, data = Micro)
```

```
> summary(modelLin1A)
```

Call:

```
lm(formula = H_max ~ Time, data = Micro)
```

Residuals:

| Min     | 1Q      | Median  | 3Q     | Max    |
|---------|---------|---------|--------|--------|
| -6.1568 | -0.7942 | -0.0993 | 0.9007 | 6.6210 |

Coefficients:

|             | Estimate | Std. Error | t value | Pr(> t )   |
|-------------|----------|------------|---------|------------|
| (Intercept) | 0.79422  | 0.44954    | 1.767   | 0.0823 .   |
| Time        | 0.25656  | 0.01528    | 16.790  | <2e-16 *** |

---

Signif. codes: 0 '\*\*\*' 0.001 '\*\*' 0.01 '\*' 0.05 '.' 0.1 ' ' 1

Residual standard error: 2.014 on 61 degrees of freedom

Multiple R-squared: 0.8221, Adjusted R-squared: 0.8192

F-statistic: 281.9 on 1 and 61 DF, p-value: < 2.2e-16

> #---Linear **CONTROL**

```
modelLin1B <- lm(H_max~ Time, data = Control)
```

```
> summary(modelLin1B)
```

Call: lm(formula = H\_max ~ Time, data = Control)

Residuals:

| Min     | 1Q      | Median  | 3Q     | Max    |
|---------|---------|---------|--------|--------|
| -4.3281 | -0.9498 | -0.2854 | 0.8541 | 8.2719 |

Coefficients:

|  | Estimate | Std. Error | t value | Pr(> t ) |
|--|----------|------------|---------|----------|
|--|----------|------------|---------|----------|

(Intercept) 0.72562 0.51882 1.399 0.168

Time 0.32358 0.01764 18.347 <2e-16 \*\*\*

---

Signif. codes: 0 '\*\*\*' 0.001 '\*\*' 0.01 '\*' 0.05 '.' 0.1 ' ' 1

Residual standard error: 2.191 on 54 degrees of freedom

Multiple R-squared: 0.8618, Adjusted R-squared: 0.8592

F-statistic: 336.6 on 1 and 54 DF, p-value: < 2.2e-16

## 2: Graphs of Specific Leaf Area of *Senecio inaequinsens* and *Centaurea cianus*

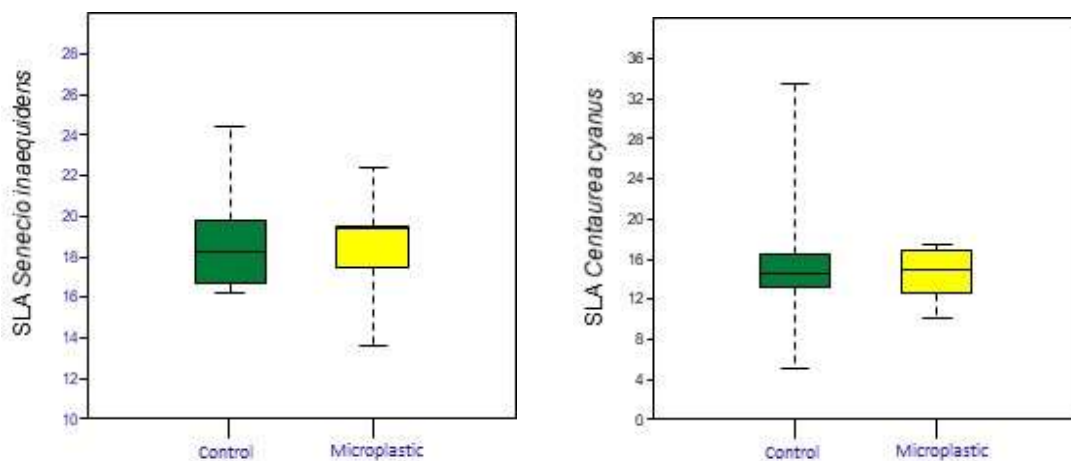

Specific Leaf Area of *Senecio inaequinsens* (on the left) and *Centaurea cianus* (on the right) with no significant difference between control and treatment

### 3: Photosynthetic efficiency of *S. inaequindes* (n.s.)

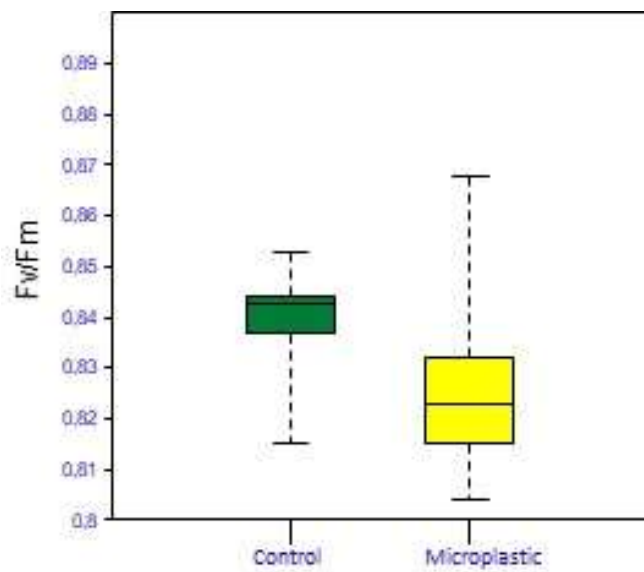

Photosynthetic efficiency of *S. inaequindes* expressed as the index Fv/Fm, did not differ between control and treatment
